# Supplementary material for: PEATGRIDS: Mapping thickness and carbon stock of global peatlands via digital soil mapping
Source: Copernicus journal article supplement (doi:10.5194/essd-2024-333), 2024-08-27
Supplement: Supplementary file 1 [file essd-2024-333-supplement.pdf]

## Supplementary Materials

**Table S1: List of data sources for peat thickness, bulk density (BD), and carbon content (CC) across the globe.**

| Peat region                                                                          | Sources                                                                                      | Data type | Data coverage         | Thickness | Bulk Density | Carbon Content |
|--------------------------------------------------------------------------------------|----------------------------------------------------------------------------------------------|-----------|-----------------------|-----------|--------------|----------------|
| Global                                                                               | International Soil Carbon Network (Nave et al., 2022)                                        | points    | Global                |           |              | x              |
|                                                                                      | The World Soil Information Service ( <a href="#">WoSIS</a> )                                 | points    | Global                |           | x            | x              |
|                                                                                      | Watmough et al. (2022)                                                                       | points    | Global                | x         |              | x              |
| Northern                                                                             | Deragon et al. (2022)                                                                        | points    | Eastern Canada        | x         | x            | x              |
|                                                                                      | <a href="#">GTK Finland</a>                                                                  | points*   | Finland               | x         |              |                |
|                                                                                      | Hugelius et al. (2020)                                                                       | points    | Northern peatland     | x         |              |                |
|                                                                                      | Loisel et al. (2014)                                                                         | points    | Northern peatland     | x         | x            | x              |
|                                                                                      | Peatland ACTION ( <a href="#">NatureScot</a> )                                               | points    | Scotland              | x         |              |                |
|                                                                                      | Rimondini et al. (2023)                                                                      | map       | Sweden                | x         |              |                |
|                                                                                      | Sheng (2016)                                                                                 | points    | Western Siberia       | x         |              |                |
|                                                                                      | Soil Data NL ( <a href="https://bodemdata.nl/downloads">https://bodemdata.nl/downloads</a> ) | map       | Netherlands           | x         |              |                |
| Tropic                                                                               | Toberman et al. (2016)                                                                       | points    | England               | x         | x            | x              |
|                                                                                      | Anshari et al. (2010)                                                                        | points    | Kalimantan, Indonesia |           | x            | x              |
|                                                                                      | Barus et al. (2021)                                                                          | points    | Papua, Indonesia      | x         |              | x              |
|                                                                                      | Crezee et al. (2022)                                                                         | points    | Congo                 | x         |              |                |
|                                                                                      | Gani et al. (2021)                                                                           | points    | Papua, Indonesia      | x         | x            | x              |
|                                                                                      | Hastie et al. (2022)                                                                         | points    | Peru                  | x         | x            | x              |
|                                                                                      | Lawson et al. (2023)                                                                         | points    | Peru                  | x         |              |                |
|                                                                                      | Ono et al. (2015)                                                                            | points    | Papua New Guinea      | x         |              | x              |
|                                                                                      | Ruwaimana et al. (2020)                                                                      | points    | Southeast Asia        | x         |              |                |
|                                                                                      | Sangkok et al. (2020)                                                                        | points    | Malaysia              | x         | x            | x              |
|                                                                                      | Shimada et al. (2001)                                                                        | points    | Kalimantan, Indonesia | x         | x            | x              |
| The Sustainable Wetlands Adaptation and Mitigation Program ( <a href="#">SWAMP</a> ) | points                                                                                       | Tropical  | x                     | x         | x            |                |
| Southern                                                                             | Pfeiffer et al. (2019)                                                                       | points    | Chile                 | x         | x            | x              |

\*We only obtained about 2,000 out of 10,000 available points from the website.

**Table S2: List of random forest hyperparameters that underwent optimization during model's training using RandomForestRegression function in Python.**

| <b>Parameters</b>       | <b>Description</b>                                                                                                                      | <b>Range</b>            |
|-------------------------|-----------------------------------------------------------------------------------------------------------------------------------------|-------------------------|
| <i>n_estimators</i>     | The number of trees in the forest.                                                                                                      | 400, 450, 500, 550, 600 |
| <i>max_features</i>     | The number of features to consider when looking for the best split.                                                                     | None, 'sqrt'            |
| <i>max_samples</i>      | The number of samples to draw from the training dataset to train each base estimator.                                                   | 0.5, 0.625, 0.75, None  |
| <i>min_samples_leaf</i> | The minimum number of samples required to be at a leaf node. This may have the effect of smoothing the model, especially in regression. | 3, 5, 7, 10             |

**Table S3: Prediction accuracy of random forest models for each parameter during training. The value for each goodness metrics reflects the average accuracy of multiple models from the modelling scheme. The n is the amount of data for testing, RMSE = root mean square error (in parameter's unit), R<sup>2</sup> = coefficient of determinant (unitless).**

| Parameters            | Unit               | Peatland region               | n      | RMSE | R <sup>2</sup> |
|-----------------------|--------------------|-------------------------------|--------|------|----------------|
| <b>Thickness</b>      | m                  | A—North America               | 1,425  | 1.10 | 0.65           |
|                       |                    | B—Europe and Russia           | 13,245 | 0.54 | 0.79           |
|                       |                    | C—Latin America               | 1,499  | 0.35 | 0.83           |
|                       |                    | D—Africa                      | 122    | 0.57 | 0.86           |
|                       |                    | E—South and Southeast Asia    | 1,245  | 1.05 | 0.86           |
|                       |                    | F—Australia and New Zealand   | 577    | 0.52 | 0.89           |
|                       |                    | <b>peat layers (cm depth)</b> |        |      |                |
| <b>Bulk density</b>   | Mg m <sup>-3</sup> | 0 - 15                        | 9,544  | 0.05 | 0.84           |
|                       |                    | 15 - 30                       | 12,484 | 0.07 | 0.93           |
|                       |                    | 30 - 60                       | 9,460  | 0.06 | 0.87           |
|                       |                    | 60 - 100                      | 7,105  | 0.02 | 0.87           |
|                       |                    | 100 - 200                     | 6,698  | 0.02 | 0.84           |
| <b>Carbon content</b> | g g <sup>-1</sup>  | 0 - 15                        | 5,198  | 0.05 | 0.90           |
|                       |                    | 15 - 30                       | 4,941  | 0.06 | 0.87           |
|                       |                    | 30 - 60                       | 2,727  | 0.08 | 0.75           |
|                       |                    | 60 - 100                      | 574    | 0.05 | 0.77           |
|                       |                    | 100 - 200                     | 393    | 0.06 | 0.75           |

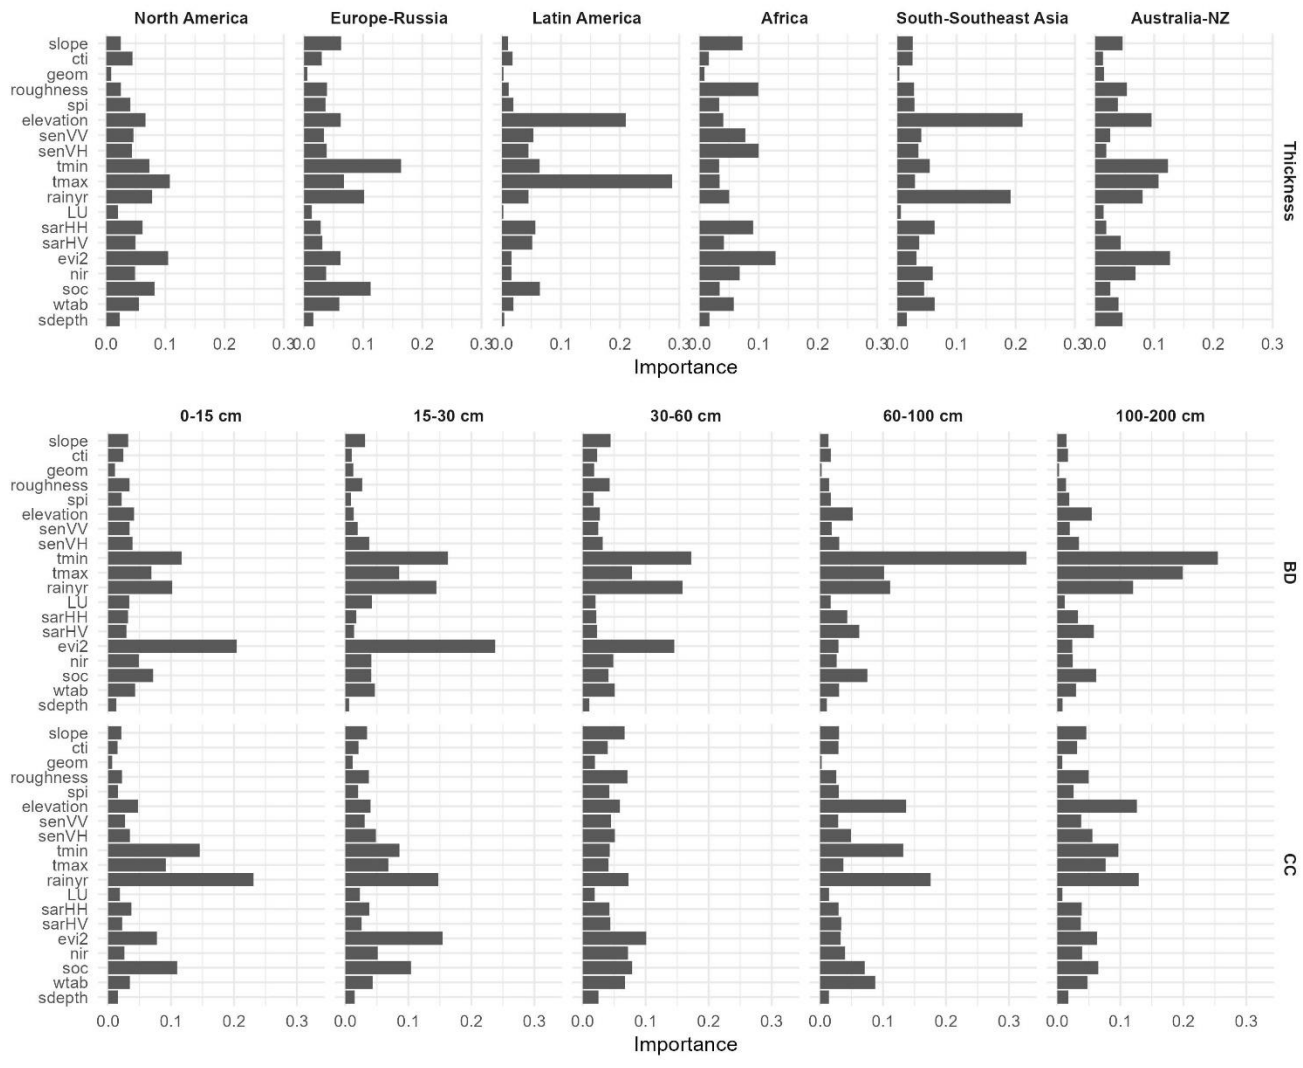

**Figure S1: Variable importance of input features used in random forest models for each parameter in this work. Features in Y axis follow the bands order in Table 1. BD = Bulk Density, CC = Carbon Content.**

## References

- Amatulli, G., McInerney, D., Sethi, T., Strobl, P., and Domisch, S.: Geomorpho90m, empirical evaluation and accuracy assessment of global high-resolution geomorphometric layers, *Scientific Data*, 7, 162, <https://doi.org/10.1038/s41597-020-0479-6>, 2020.
- Anshari, G. Z., Afifudin, M., Nuriman, M., Gusmayanti, E., Arianie, L., Susana, R., Nusantara, R. W., Sugardjito, J., and Rafiastanto, A.: Drainage and land use impacts on changes in selected peat properties and peat degradation in West Kalimantan Province, Indonesia, *Biogeosciences*, 7, 3403-3419, <https://doi.org/10.5194/bg-7-3403-2010>, 2010.
- Barus, P. A., Hati, D. P., and Yatno, E.: Properties of peat soil formed in lacustrine plains surrounded by tectonic hills in Papua Highland, *IOP Conference Series: Earth and Environmental Science*, 648, 012010, <https://doi.org/10.1088/1755-1315/648/1/012010>, 2021.
- Beasom, S. L., Wiggers, E. P., and Giardino, J. R.: A Technique for Assessing Land Surface Ruggedness, *The Journal of Wildlife Management*, 47, 1163-1166, <https://doi.org/10.2307/3808184>, 1983.
- Beven, K. J. and Kirkby, M. J.: A physically based, variable contributing area model of basin hydrology / Un modèle à base physique de zone d'appel variable de l'hydrologie du bassin versant, *Hydrological Sciences Bulletin*, 24, 43-69, <https://doi.org/10.1080/02626667909491834>, 1979.
- Crezee, B., Dargie, G. C., Ewango, C. E. N., Mitchard, E. T. A., Emba B, O., Kanyama T, J., Bola, P., Ndjango, J.-B. N., Girkin, N. T., Bocko, Y. E., Ifo, S. A., Hubau, W., Seidensticker, D., Batumike, R., Imani, G., Cuní-Sanchez, A., Kiahtipes, C. A., Lebamba, J., Wotzka, H.-P., Bean, H., Baker, T. R., Baird, A. J., Boom, A., Morris, P. J., Page, S. E., Lawson, I. T., and Lewis, S. L.: Mapping peat thickness and carbon stocks of the central Congo Basin using field data, *Nature Geoscience*, 15, 639-644, <https://doi.org/10.1038/s41561-022-00966-7>, 2022.
- Deragon, R., Saurette, D. D., Heung, B., and Caron, J.: Mapping the maximum peat thickness of cultivated organic soils in the southwest plain of Montreal, *Canadian Journal of Soil Science*, 103, 103-120, <https://doi.org/10.1139/cjss-2022-0031>, 2022.
- Didan, K. and Barreto, A.: VIIRS/NPP Vegetation Indices 16-Day L3 Global 500m SIN Grid V001 [dataset], <https://doi.org/10.5067/VIIRS/VNP13A1.001>, 2018.
- European Space Agency, S.: Copernicus Global Digital Elevation Model, OpenTopography [dataset], <https://doi.org/10.5069/G9028PQB>, 2021.
- Fan, Y., Li, H., and Miguez-Macho, G.: Global Patterns of Groundwater Table Depth, *Science*, 339, 940-943, <https://doi.org/10.1126/science.1229881>, 2013.
- Friedl, M. A. and Sulla-Menashe, D.: MODIS/Terra+Aqua Land Cover Type Yearly L3 Global 500m SIN Grid V061 [dataset], <https://doi.org/10.5067/MODIS/MCD12Q1.061>, 2022.
- Gani, R. A., Barus, P. A., and Sukarman: Properties and carbon stocks of tropical tidal peat soils deposited on coral limestone in Numfor and Supiori Islands, Papua Province, *IOP Conference Series: Earth and Environmental Science*, 648, 012001, <https://doi.org/10.1088/1755-1315/648/1/012001>, 2021.
- Hastie, A., Honorio Coronado, E. N., Reyna, J., Mitchard, E. T. A., Åkesson, C. M., Baker, T. R., Cole, L. E. S., Oroche, C. J. C., Dargie, G., Dávila, N., De Grandi, E. C., Del Águila, J., Del Castillo Torres, D., De La Cruz Paiva, R., Draper, F. C., Flores, G., Grández, J., Hergoualc'h, K., Householder, J. E., Janovec, J. P., Lähteenoja, O., Reyna, D., Rodríguez-Veiga, P., Roucoux, K. H., Tobler, M., Wheeler, C. E., Williams, M., and Lawson, I. T.: Risks to carbon storage from land-use change revealed by peat thickness maps of Peru, *Nature Geoscience*, 15, 369-374, <https://doi.org/10.1038/s41561-022-00923-4>, 2022.
- Hijmans, R. J., Cameron, S. E., Parra, J. L., Jones, P. G., and Jarvis, A.: Very high resolution interpolated climate surfaces for global land areas, *International Journal of Climatology*, 25, 1965-1978, <https://doi.org/10.1002/joc.1276>, 2005.
- Hugelius, G., Loisel, J., Chadburn, S., Jackson, R. B., Jones, M., MacDonald, G., Marushchak, M., Olefeldt, D., Packalen, M., Siewert, M. B., Treat, C., Turetsky, M., Voigt, C., and Yu, Z.: Large stocks of peatland carbon and nitrogen are vulnerable to permafrost thaw, *Proceedings of the National Academy of Sciences*, 117, 20438-20446, <https://doi.org/10.1073/pnas.1916387117>, 2020.
- Jasiewicz, J. and Stepinski, T. F.: Geomorphons — a pattern recognition approach to classification and mapping of landforms, *Geomorphology*, 182, 147-156, <https://doi.org/10.1016/j.geomorph.2012.11.005>, 2013.
- Lawson, I. T., Åkesson, C., Baker, T. R., Cordova Oroche, C. J., Dargie, G. C., del Aguila-Pasquel, J., Grandez Ríos, J., Hastie, A., Honorio Coronado, E. N., Mitchard, E. T., Roucoux, K. H., Reyna Huaymacari, J., and Williams, M.: Peat depths from the Pastaza-Marañón Basin, Amazonian Peru, 2019-2020, NERC EDS Environmental Information Data Centre [dataset], <https://doi.org/10.5285/ab13a06f-392f-4bc6-b1bf-06dd8b020307>, 2023.

Loisel, J., Yu, Z., Beilman, D. W., Camill, P., Alm, J., Amesbury, M. J., Anderson, D., Andersson, S., Bochicchio, C., Barber, K., Belyea, L. R., Bunbury, J., Chambers, F. M., Charman, D. J., De Vleeschouwer, F., Fiałkiewicz-Kozieł, B., Finkelstein, S. A., Galka, M., Garneau, M., Hammarlund, D., Hinchcliffe, W., Holmquist, J., Hughes, P., Jones, M. C., Klein, E. S., Kokfelt, U., Korhola, A., Kuhry, P., Lamarre, A., Lamentowicz, M., Large, D., Lavoie, M., MacDonald, G., Magnan, G., Mäkilä, M., Mallon, G., Mathijssen, P., Mauquoy, D., McCarroll, J., Moore, T. R., Nichols, J., O'Reilly, B., Oksanen, P., Packalen, M., Peteet, D., Richard, P. J., Robinson, S., Ronkainen, T., Rundgren, M., Sannel, A. B. K., Tarnocai, C., Thom, T., Tuittila, E.-S., Turetsky, M., Väliranta, M., van der Linden, M., van Geel, B., van Bellen, S., Vitt, D., Zhao, Y., and Zhou, W.: A database and synthesis of northern peatland soil properties and Holocene carbon and nitrogen accumulation, *The Holocene*, 24, 1028-1042, 10.1177/0959683614538073, 2014.

Moore, I. D., Grayson, R. B., and Ladson, A. R.: Digital terrain modelling: A review of hydrological, geomorphological, and biological applications, *Hydrological Processes*, 5, 3-30, <https://doi.org/10.1002/hyp.3360050103>, 1991.

Nave, L., Johnson, K., van Ingen, C., Agarwal, D., Humphrey, M., and Beekwilder, N.: International Soil Carbon Network version 3 Database (ISCN3) ver 1, Environmental Data Initiative. [dataset], <https://doi.org/10.6073/pasta/cc751923c5576b95a6d6a227d5afe8ba>, 2022.

Ono, E., Umemura, M., Ishida, T., and Takenaka, C.: Preliminary investigation of the formation age and chemical characterization of the tropical peat in the middle Sepik Plain, northern Papua New Guinea, *Geoscience Letters*, 2, 1, <https://doi.org/10.1186/s40562-015-0021-4>, 2015.

Pelletier, J. D., Broxton, P. D., Hazenberg, P., Zeng, X., Troch, P. A., Niu, G., Williams, Z. C., Brunke, M. A., and Gochis, D.: Global 1-km Gridded Thickness of Soil, Regolith, and Sedimentary Deposit Layers, 10.3334/ORNDAAC/1304, 2016.

Pfeiffer, M., Padarian, J., Osorio, R., Bustamante, N., Olmedo, G., Guevara, M., Aburto, F., Antilen, M., Araya, E., Arellano, E., Barret, M., Barrera, J., Boeckx, P., Briceño, M., Bunning, S., Cabrol, L., Casanova, M., Cornejo, P., Curaqueo, G., Doetterl, S., Duran, P., Escudey, M., Espinoza, A., Francke, S., Fuentes, J. P., Fuentes, M., Gajardo, G., García, R., Gallaud, A., Galleguillos, M., Gomez, A., Hidalgo, M., Ivelic-Sáez, J., Mashalaba, L., Matus, F., Mora, M., Mora, J., Muñoz, C., Norambuena, P., Olivera, C., Ovalle, C., Panichini, M., Pauchard, A., Perez-Quezada, J., Radic, S., Ramirez, J., Riveras, N., Ruiz, G., Salazar, O., Salgado, I., Seguel, O., Sepúlveda, M., Sierra, C., Tapia, Y., Toledo, B., Torrico, J. M., Valle, S., Vargas, R., Wolff, M., and Zagal, E.: CHLSOC: The Chilean Soil Organic Carbon database [dataset], <https://doi.org/10.17605/OSF.IO/NMYS3>, 2019.

Poggio, L., de Sousa, L. M., Batjes, N. H., Heuvelink, G. B. M., Kempen, B., Ribeiro, E., and Rossiter, D.: SoilGrids 2.0: producing soil information for the globe with quantified spatial uncertainty, *SOIL*, 7, 217-240, <https://doi.org/10.5194/soil-7-217-2021>, 2021.

Rimondini, L., Gumbrecht, T., Ahlström, A., and Hugelius, G.: Mapping of peatlands in the forested landscape of Sweden using lidar-based terrain indices, *Earth Syst. Sci. Data*, 15, 3473-3482, <https://doi.org/10.5194/essd-15-3473-2023>, 2023.

Ruwaimana, M., Anshari, G. Z., Silva, L. C. R., and Gavin, D. G.: The oldest extant tropical peatland in the world: a major carbon reservoir for at least 47 000 years, *Environmental Research Letters*, 15, 114027, <https://doi.org/10.1088/1748-9326/abb853>, 2020.

Sangkok, F. E., Sugiura, Y., Maie, N., Melling, L., Nakamura, T., Ikeya, K., and Watanabe, A.: Variations in the rate of accumulation and chemical structure of soil organic matter in a coastal peatland in Sarawak, Malaysia, *CATENA*, 184, 104244, <https://doi.org/10.1016/j.catena.2019.104244>, 2020.

Sheng, Y.: West Siberian Lowland Peatland GIS Data Collection, Arctic Data Center [dataset], <https://doi.org/10.5065/D65T3HM5>, 2016.

Shimada, M., Itoh, T., Motooka, T., Watanabe, M., Shiraishi, T., Thapa, R., and Lucas, R.: New global forest/non-forest maps from ALOS PALSAR data (2007–2010), *Remote Sens Environ*, 155, 13-31, <https://doi.org/10.1016/j.rse.2014.04.014>, 2014.

Shimada, S., Takahashi, H., Haraguchi, A., and Kaneko, M.: The carbon content characteristics of tropical peats in Central Kalimantan, Indonesia: Estimating their spatial variability in density, *Biogeochemistry*, 53, 249-267, <https://doi.org/10.1023/A:1010618807469>, 2001.

Toberman, H., Tipping, E., Facility, N. R., Somerville, C., Helliwell, R., Carter, H., Keenan, P., Pereira, M. G., Patel, M., Tanna, B., Thompson, N., Bryant, C., Elliott, F., and Gulliver, P.: Peat survey in England, Scotland and Wales carried out during 2014 [LTLS], <https://doi.org/10.5285/9305b068-f417-4659-9966-d9456f22c331>, 2016.

Watmough, S., Gilbert-Parkes, S., Basiliko, N., Lamit, L. J., Lilleskov, E. A., Andersen, R., del Aguila-Pasquel, J., Artz, R. E., Benschoter, B. W., Borken, W., Bragazza, L., Brandt, S. M., Bräuer, S. L., Carson, M. A., Chen, X.,

Chimner, R. A., Clarkson, B. R., Cobb, A. R., Enriquez, A. S., Farmer, J., Grover, S. P., Harvey, C. F., Harris, L. I., Hazard, C., Hoyt, A. M., Hribljan, J., Jauhiainen, J., Juutinen, S., Kane, E. S., Knorr, K.-H., Kolka, R., Könönen, M., Laine, A. M., Larmola, T., Levasseur, P. A., McCalley, C. K., McLaughlin, J., Moore, T. R., Mykityczuk, N., Normand, A. E., Rich, V., Robinson, B., Rupp, D. L., Rutherford, J., Schadt, C. W., Smith, D. S., Spiers, G., Tedersoo, L., Thu, P. Q., Trettin, C. C., Tuittila, E.-S., Turetsky, M., Urbanová, Z., Varner, R. K., Waldrop, M. P., Wang, M., Wang, Z., Warren, M., Wiedermann, M. M., Williams, S. T., Yavitt, J. B., Yu, Z.-G., and Zahn, G.: Variation in carbon and nitrogen concentrations among peatland categories at the global scale, PLOS ONE, 17, e0275149, <https://doi.org/10.1371/journal.pone.0275149>, 2022.
